# Supplementary material
Source: PubMed Central journal article supplement (PMC8017403)
Supplement: ryai180050suppa1.pdf [file ryai180050suppa1.pdf]

## Appendix E1

### Patients Used for the Development of Classification Networks and in Radiogenomic Analysis

| PatientID             | VoxelDimensions (mm) | BitDepth | ScannerManufacturer | Field Strength (T) |
|-----------------------|----------------------|----------|---------------------|--------------------|
| TCGA_CS_4941_19960909 | 0.78124/0.78124/7.5  | 16       | GE                  | 1.5                |
| TCGA_CS_4942_19970222 | 0.89844/0.89844/7.5  | 12       | Philips             | 3                  |
| TCGA_CS_4943_20000902 | 0.85938/0.85938/2.5  | 12       | Siemens             | 1.5                |
| TCGA_CS_4944_20010208 | 0.85938/0.85938/2.5  | 12       | Siemens             | 1.5                |
| TCGA_CS_5393_19990606 | 0.85938/0.85938/2.5  | 12       | Siemens             | 1.5                |
| TCGA_CS_5395_19981004 | 0.85938/0.85938/2.5  | 12       | Siemens             | 1.5                |
| TCGA_CS_5396_20010302 | 0.6875/0.6875/7.5    | 12       | Philips             | 3                  |
| TCGA_CS_5397_20010315 | 0.68452/0.68452/7.5  | 12       | Philips             | 3                  |
| TCGA_CS_6186_20000601 | 0.85938/0.85938/7    | 12       | Philips             | 1.5                |
| TCGA_CS_6188_20010812 | 0.6875/0.6875/7.5    | 12       | Philips             | 3                  |
| TCGA_CS_6290_20000917 | 0.85938/0.85938/2.5  | 12       | Siemens             | 1.5                |
| TCGA_CS_6665_20010817 | 0.6875/0.6875/6      | 12       | Philips             | 3                  |
| TCGA_CS_6666_20011109 | 0.6875/0.6875/6      | 12       | Philips             | 3                  |
| TCGA_CS_6667_20011105 | 0.4297/0.4297/7.5    | 16       | GE                  | 1.5                |
| TCGA_CS_6668_20011025 | 0.6875/0.6875/6      | 12       | Philips             | 3                  |
| TCGA_CS_6669_20020102 | 0.6875/0.6875/7.5    | 12       | Philips             | 3                  |
| TCGA_DU_5849_19950405 | 0.4688/0.4688/5      | 16       | GE                  | 3                  |
| TCGA_DU_5851_19950428 | 0.9375/0.9375/5      | 16       | GE                  | 1.5                |
| TCGA_DU_5852_19950709 | 0.4688/0.4688/5      | 16       | GE                  | 3                  |
| TCGA_DU_5853_19950823 | 0.4688/0.4688/5      | 16       | GE                  | 3                  |
| TCGA_DU_5854_19951104 | 0.9375/0.9375/5      | 16       | GE                  | 1.5                |
| TCGA_DU_5855_19951217 | 0.9375/0.9375/6.0745 | 12       | Philips             | 1.5                |
| TCGA_DU_5871_19941206 | 0.4688/0.4688/5      | 16       | GE                  | 3                  |
| TCGA_DU_5872_19950223 | 0.9375/0.9375/2.5    | 16       | GE                  | 1.5                |
| TCGA_DU_5874_19950510 | 0.4688/0.4688/5      | 16       | GE                  | 3                  |
| TCGA_DU_6399_19830416 | 0.938/0.938/3        | 16       | GE                  | N/A                |
| TCGA_DU_6400_19830518 | 0.938/0.938/3        | 16       | GE                  | N/A                |
| TCGA_DU_6401_19831001 | 0.938/0.938/3        | 16       | GE                  | N/A                |
| TCGA_DU_6404_19850629 | 0.938/0.938/3        | 16       | GE                  | N/A                |
| TCGA_DU_6405_19851005 | 0.938/0.938/3        | 16       | GE                  | N/A                |
| TCGA_DU_6407_19860514 | 0.9375/0.9375/3      | 16       | GE                  | 1.5                |
| TCGA_DU_6408_19860521 | 0.938/0.938/3        | 16       | GE                  | N/A                |
| TCGA_DU_7008_19830723 | 0.938/0.938/3        | 16       | GE                  | N/A                |
| TCGA_DU_7010_19860307 | 0.9375/0.9375/3      | 16       | GE                  | 1.5                |
| TCGA_DU_7013_19860523 | 0.78125/0.78125/3    | 16       | GE                  | 1.5                |
| TCGA_DU_7014_19860618 | 0.938/0.938/3        | 16       | GE                  | N/A                |
| TCGA_DU_7018_19911220 | 0.4688/0.4688/5      | 16       | GE                  | 3                  |
| TCGA_DU_7019_19940908 | 0.4688/0.4688/5      | 16       | GE                  | 3                  |
| TCGA_DU_7294_19890104 | 0.46875/0.46875/5    | 16       | GE                  | 3                  |
| TCGA_DU_7298_19910324 | 0.9375/0.9375/5      | 16       | GE                  | 1.5                |
| TCGA_DU_7299_19910417 | 0.46875/0.46875/5    | 16       | GE                  | 3                  |
| TCGA_DU_7300_19910814 | 0.4688/0.4688/5      | 16       | GE                  | 3                  |

|                        |                      |    |         |     |
|------------------------|----------------------|----|---------|-----|
| TCGA_DU_7301_19911112  | 0.4688/0.4688/5      | 16 | GE      | 3   |
| TCGA_DU_7302_19911203  | 0.4688/0.4688/5      | 16 | GE      | 3   |
| TCGA_DU_7304_19930325  | 0.4688/0.4688/5      | 16 | GE      | 3   |
| TCGA_DU_7306_19930512  | 0.4688/0.4688/5      | 16 | GE      | 3   |
| TCGA_DU_7309_19960831  | 0.4688/0.4688/5      | 16 | GE      | 3   |
| TCGA_DU_8162_19961029  | 0.4688/0.4688/5      | 16 | GE      | 3   |
| TCGA_DU_8163_19961119  | 0.4688/0.4688/5      | 16 | GE      | 3   |
| TCGA_DU_8164_19970111  | 0.4688/0.4688/5      | 16 | GE      | 3   |
| TCGA_DU_8165_19970205  | 0.4688/0.4688/5      | 16 | GE      | 3   |
| TCGA_DU_8166_19970322  | 0.4688/0.4688/5      | 16 | GE      | 3   |
| TCGA_DU_8167_19970402  | 0.4688/0.4688/5      | 16 | GE      | 3   |
| TCGA_DU_8168_19970503  | 0.4688/0.4688/5      | 16 | GE      | 3   |
| TCGA_DU_A5TP_19970614  | 0.4688/0.4688/5      | 16 | GE      | 3   |
| TCGA_DU_A5TR_19970726  | 0.4688/0.4688/5      | 16 | GE      | 3   |
| TCGA_DU_A5TS_19970726  | 0.9375/0.9375/5      | 16 | GE      | 1.5 |
| TCGA_DU_A5TT_19980318  | 0.46875/0.46875/2.5  | 12 | Philips | 3   |
| TCGA_DU_A5TU_19980312  | 0.39062/0.39062/7    | 12 | Hitachi | 1.2 |
| TCGA_DU_A5TW_19980228  | 0.51339/0.51339/6    | 12 | Philips | 1.5 |
| TCGA_DU_A5TY_19970709  | 0.4688/0.4688/5      | 16 | GE      | 3   |
| TCGA_EZ_7264A_20010816 | 0.89844/0.89844/6    | 12 | Siemens | 1.5 |
| TCGA_FG_5962_20000626  | 1.0/1.0/3            | 12 | Siemens | 3   |
| TCGA_FG_5964_20010511  | 0.89844/0.89844/6.5  | 12 | Siemens | 1.5 |
| TCGA_FG_6688_20020215  | 1.0/1.0/4            | 12 | Siemens | 1.5 |
| TCGA_FG_6689_20020326  | 1.0/1.0/4            | 12 | Siemens | 1.5 |
| TCGA_FG_6690_20020226  | 1.0/1.0/3            | 12 | Siemens | 3   |
| TCGA_FG_6691_20020405  | 1.0/1.0/4            | 12 | Siemens | 1.5 |
| TCGA_FG_6692_20020606  | 0.89844/0.89844/5.5  | 12 | Siemens | 1.5 |
| TCGA_FG_7634_20000128  | 0.89844/0.89844/5.2  | 12 | Siemens | 3   |
| TCGA_FG_7637_20000922  | 1.0/1.0/3            | 12 | Siemens | 3   |
| TCGA_FG_7643_20021104  | 1.0/1.0/4            | 12 | Siemens | 1.5 |
| TCGA_FG_8189_20030516  | 1.0/1.0/3.3          | 12 | Siemens | 3   |
| TCGA_FG_A4MT_20020212  | 1.0/1.0/3            | 12 | Siemens | 1.5 |
| TCGA_FG_A4MU_20030903  | 0.89844/0.89844/4.52 | 12 | Siemens | 3   |
| TCGA_FG_A60 K_20040224 | 0.5/0.5/2            | 12 | Siemens | 3   |
| TCGA_HT_7473_19970826  | 0.9375/0.9375/5      | 12 | GE      | 1.5 |
| TCGA_HT_7475_19970918  | 0.9375/0.9375/5      | 12 | GE      | 1.5 |
| TCGA_HT_7602_19951103  | 0.9375/0.9375/7.5    | 12 | GE      | 1.5 |
| TCGA_HT_7605_19950916  | 0.4688/0.4688/5      | 12 | GE      | 3   |
| TCGA_HT_7608_19940304  | 0.4688/0.4688/5      | 12 | GE      | 3   |
| TCGA_HT_7616_19940813  | 0.9375/0.9375/5      | 12 | GE      | 1.5 |
| TCGA_HT_7680_19970202  | 0.9375/0.9375/7.5    | 12 | GE      | 1.5 |
| TCGA_HT_7684_19950816  | 0.9375/0.9375/7.5    | 12 | GE      | 1.5 |
| TCGA_HT_7686_19950629  | 0.9375/0.9375/7.5    | 12 | GE      | 1.5 |
| TCGA_HT_7690_19960312  | 0.9375/0.9375/7.5    | 12 | GE      | 1.5 |
| TCGA_HT_7692_19960724  | 0.9375/0.9375/7.5    | 12 | GE      | 1.5 |
| TCGA_HT_7693_19950520  | 0.9375/0.9375/7.5    | 12 | GE      | 1.5 |
| TCGA_HT_7694_19950404  | 1.0156/1.0156/7.5    | 12 | GE      | 1.5 |
| TCGA_HT_7855_19951020  | 0.4688/0.4688/7.5    | 12 | GE      | 3   |
| TCGA_HT_7856_19950831  | 0.9375/0.9375/5      | 12 | GE      | 1.5 |
| TCGA_HT_7860_19960513  | 0.9375/0.9375/7.5    | 12 | GE      | 1.5 |
| TCGA_HT_7874_19950902  | 0.9375/0.9375/7.5    | 12 | GE      | 1.5 |

|                       |                     |    |    |     |
|-----------------------|---------------------|----|----|-----|
| TCGA_HT_7877_19980917 | 0.4688/0.4688/5     | 16 | GE | 3   |
| TCGA_HT_7879_19981009 | 0.4688/0.4688/5     | 16 | GE | 3   |
| TCGA_HT_7881_19981015 | 1.0156/1.0156/2     | 16 | GE | 1.5 |
| TCGA_HT_7882_19970125 | 0.9375/0.9375/5     | 12 | GE | 1.5 |
| TCGA_HT_7884_19980913 | 0.4688/0.4688/7     | 16 | GE | 1.5 |
| TCGA_HT_8018_19970411 | 0.9375/0.9375/7.5   | 12 | GE | 1.5 |
| TCGA_HT_8105_19980826 | 0.4688/0.4688/7     | 16 | GE | 1.5 |
| TCGA_HT_8106_19970727 | 0.9375/0.9375/7.5   | 12 | GE | 1.5 |
| TCGA_HT_8107_19980708 | 0.4688/0.4688/7.5   | 16 | GE | 3   |
| TCGA_HT_8111_19980330 | 0.4688/0.4688/7     | 16 | GE | 1.5 |
| TCGA_HT_8113_19930809 | 0.93749/0.93749/7.5 | 12 | GE | 1.5 |
| TCGA_HT_8114_19981030 | 0.4688/0.4688/7     | 16 | GE | 1.5 |
| TCGA_HT_8563_19981209 | 0.4688/0.4688/7     | 16 | GE | 1.5 |
| TCGA_HT_A5RC_19990831 | 0.4688/0.4688/5     | 16 | GE | 1.5 |
| TCGA_HT_A616_19991226 | 0.4688/0.4688/5     | 16 | GE | 3   |
| TCGA_HT_A61A_20000127 | 1.0156/1.0156/2     | 16 | GE | 3   |
| TCGA_HT_A61B_19991127 | 1.0156/1.0156/2     | 16 | GE | 3   |

## Appendix E2

**Table E2.1. Architecture of a Convolutional Neural Network Trained from Scratch on Low-Grade Glioma MRI Data Only. ReLU = Rectified Linear Unit, LRN = Local Response Normalization.**

| Layer                  | Data dimensions | Kernel size | Stride |
|------------------------|-----------------|-------------|--------|
| Input                  | 80 × 80x1       | —           | —      |
| Convolution + ReLU     | 40 × 40x96      | 5 × 5       | 2 × 2  |
| MaxPooling + LRN       | 20 × 20x96      | 3 × 3       | 2 × 2  |
| Convolution + ReLU     | 20 × 20x256     | 5 × 5       | 1 × 1  |
| MaxPooling + LRN       | 10 × 10x256     | 2 × 2       | 1 × 1  |
| Convolution + ReLU     | 10 × 10x384     | 3 × 3       | 1 × 1  |
| MaxPooling + LRN       | 5 × 5x384       | 3 × 3       | 2 × 2  |
| Fully Connected + ReLU | 512             | —           | —      |
| Dropout (50%)          | 512             | —           | —      |
| Fully Connected + ReLU | 512             | —           | —      |
| Dropout (50%)          | 512             | —           | —      |
| Fully Connected        | 3               | —           | —      |
| Softmax                | 3               | —           | —      |

**Table E2.2. Hyperparameters Used for Training a Convolutional Neural Network from Scratch on LGG MRI Data Only.**

| Hyperparameter                       | Value                             |
|--------------------------------------|-----------------------------------|
| Number of backpropagation iterations | 4000                              |
| Optimizer                            | Stochastic Gradient Descent (SGD) |
| Batch size                           | 128                               |
| Momentum                             | 0.9                               |
| Initial learning rate                | 0.001                             |
| Learning rate decay step size        | 1000 iterations                   |
| Learning rate decay value            | 0.5                               |

**Table E2.3. Architecture of a Convolutional Neural Network Pretrained with Glioblastoma MRI data. ReLU = Rectified Linear Unit,**

| Layer                  | Data dimensions | Kernel size | Stride |
|------------------------|-----------------|-------------|--------|
| Input                  | 80 × 80 × 1     | —           | —      |
| Convolution + ReLU     | 80 × 80 × 64    | 3 × 3       | 1 × 1  |
| Convolution + ReLU     | 80 × 80 × 64    | 3 × 3       | 1 × 1  |
| MaxPooling             | 40 × 40 × 96    | 3 × 3       | 2 × 2  |
| Convolution + ReLU     | 20 × 20 × 128   | 3 × 3       | 1 × 1  |
| Convolution + ReLU     | 20 × 20 × 128   | 3 × 3       | 1 × 1  |
| MaxPooling             | 10 × 10 × 128   | 3 × 3       | 2 × 2  |
| Fully Connected + ReLU | 256             | —           | —      |
| Dropout (50%)          | 256             | —           | —      |
| Fully Connected + ReLU | 256             | —           | —      |
| Dropout (50%)          | 256             | —           | —      |
| Fully Connected        | 3               | —           | —      |
| Softmax                | 3               | —           | —      |

**Table E2.4. Hyperparameters Used for Fine-Tuning a CNN Pretrained with GBM MRI Data.**

| Hyperparameter                       | Value                             |
|--------------------------------------|-----------------------------------|
| Number of backpropagation iterations | 4000                              |
| Optimizer                            | Stochastic Gradient Descent (SGD) |
| Batch size                           | 128                               |
| Momentum                             | 0.9                               |
| Initial learning rate                | 0.003                             |
| Learning rate decay step size        | 1000 iterations                   |
| Learning rate decay value            | 0.5                               |

### Appendix E3

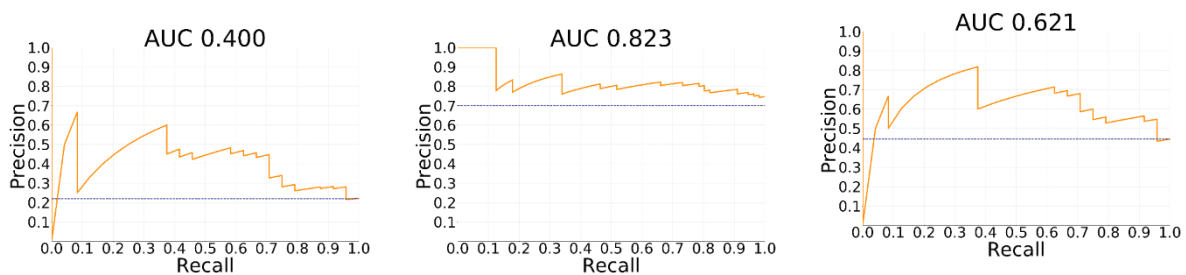

a) CoC2 vs all other clusters

b) CoC1 vs CoC2

c) CoC2 vs CoC3

**Figure E3.1:** Precision/recall curves for transfer learning from GBM MRI experiment related to cluster CoC2.

**Table E3.1. Results for Classifying CoC with Respect to AUC with 95% Confidence Intervals for the Training from Scratch Experiment.**

| Output cluster | 2                    | 3                    | One versus all       |
|----------------|----------------------|----------------------|----------------------|
| 1              | 0.676 [0.540, 0.804] | 0.558 [0.415, 0.689] | 0.610 [0.507, 0.719] |
| 2              | —                    | 0.643 [0.481, 0.792] | 0.680 [0.538, 0.811] |
| 3              | —                    | —                    | 0.537 [0.405, 0.667] |

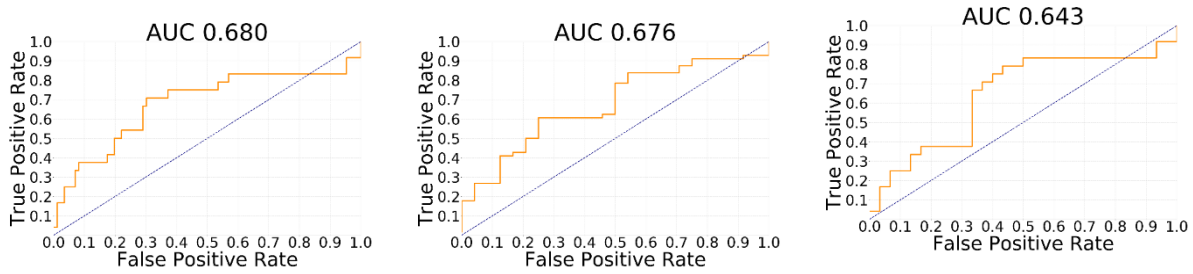

a) CoC2 vs all other clusters      b) CoC1 vs CoC2      c) CoC2 vs CoC3

**Figure E3.2: ROC curves for discriminating CoC clusters for training from scratch experiment related to cluster CoC2.**

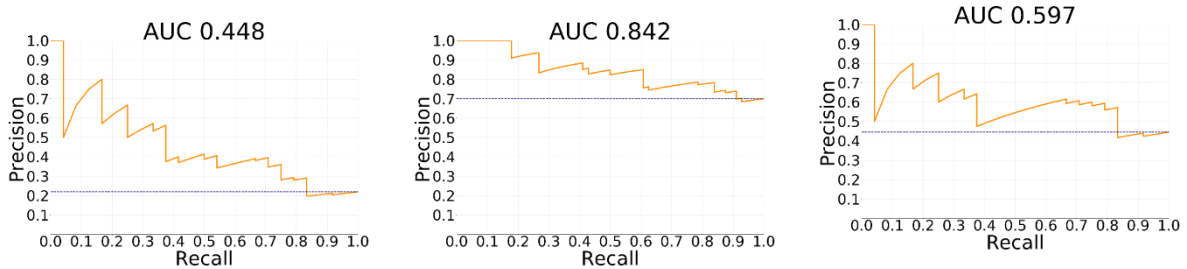

a) CoC2 vs all other clusters      b) CoC1 vs CoC2      c) CoC2 vs CoC3

**Figure E3.3: Precision/recall curves for discriminating CoC clusters for training from scratch experiment related to cluster CoC2.**

**Table E3.2: Results for Classifying CoC with Respect to AUC with 95% Confidence Intervals for the Transfer Learning from ImageNet Experiment.**

| Output cluster | 2                    | 3                    | One versus all       |
|----------------|----------------------|----------------------|----------------------|
| 1              | 0.731 [0.601, 0.844] | 0.667 [0.544, 0.782] | 0.695 [0.599, 0.790] |
| 2              | —                    | 0.547 [0.388, 0.699] | 0.640 [0.521, 0.763] |
| 3              | —                    | —                    | 0.507 [0.381, 0.639] |

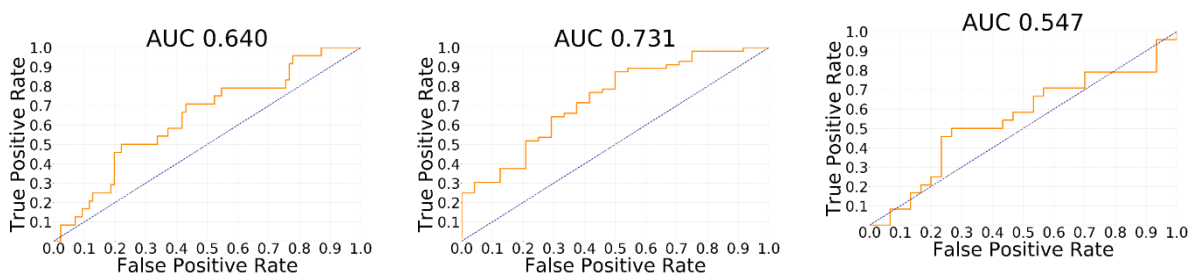

a) CoC2 vs all other clusters

b) CoC1 vs CoC2

c) CoC2 vs CoC3

**Figure E3.4:** ROC curves for discriminating CoC clusters for transfer learning from ImageNet experiment related to cluster 2.

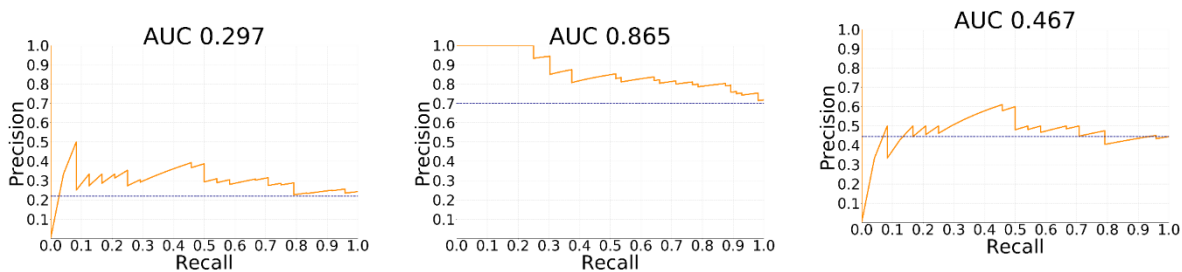

a) CoC2 vs all other clusters

b) CoC1 vs CoC2

c) CoC2 vs CoC3

**Figure E3.5:** Precision/recall curves for discriminating CoC clusters for transfer learning from ImageNet experiment related to cluster CoC2.
